# Supplementary material
Source: MDPI journal article supplement (https://www.mdpi.com/2624-8549/5/2/74)
Supplement: s1 [file s1]

## Supporting Information for the article

# Exploiting Supramolecular Synthons in Cocrystals of Two Racetams with 4-Hydroxybenzoic Acid and 4-Hydroxybenzamide Coformers

Jason Marquez <sup>1</sup>, Egor Novikov <sup>1</sup>, Sergei Rigin <sup>1,2</sup>, Marina S. Fonari <sup>1,3</sup>, Raúl Castañeda <sup>1</sup>, Tatiana Kornilova <sup>1</sup> and Tatiana V. Timofeeva <sup>1,\*</sup>

<sup>1</sup> Department of Chemistry, New Mexico Highlands University, Las Vegas, NM 87701, USA; jmarquez10@live.nmhu.edu (J.M.); enovikov@live.nmhu.edu (E.N.); rigindale@gmail.com (S.R.); fonari.xray@gmail.com (M.S.F.); lrcastaneda@nmhu.edu (R.C.); tkornilova@live.nmhu.edu (T.K.)

<sup>2</sup> Department of Materials Science and Engineering, North Carolina State University, Raleigh, NC 27606, USA

<sup>3</sup> Institute of Applied Physics, Moldova State University, Academiei Str. 5, MD2028 Chisinau, Moldova

\* Correspondence: tvtimofeeva@nmhu.edu

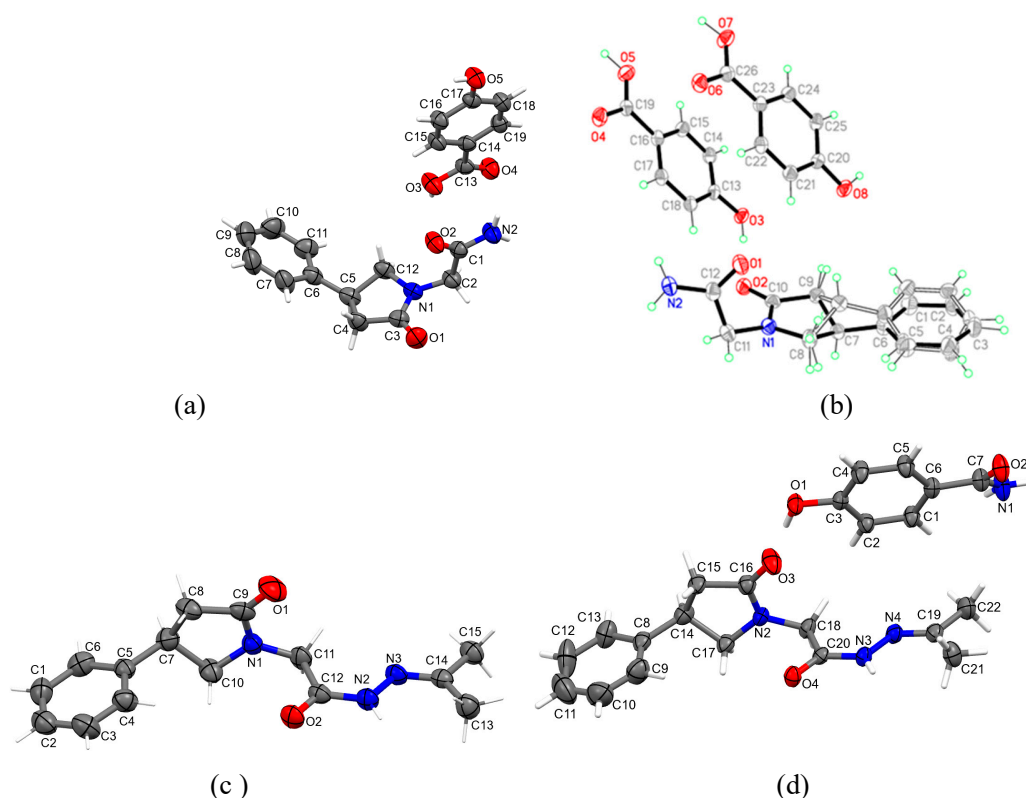

**Figure S1.** ORTEP drawings with labelling schemes for (a) **PPA·HBA**; (b) **PPA·2HBA** – with indication of disorder; (c) **PPAH** and (d) **PPAH·HBD**.

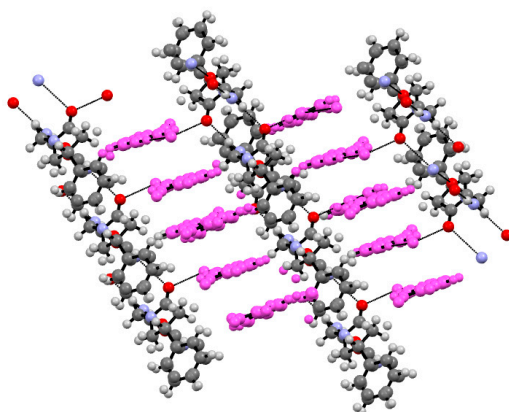

**Figure S2.** Alternation of homomeric **PPA** and **HBA** (pink) H-bonded layers in cocrystal **PPA2HBA**.

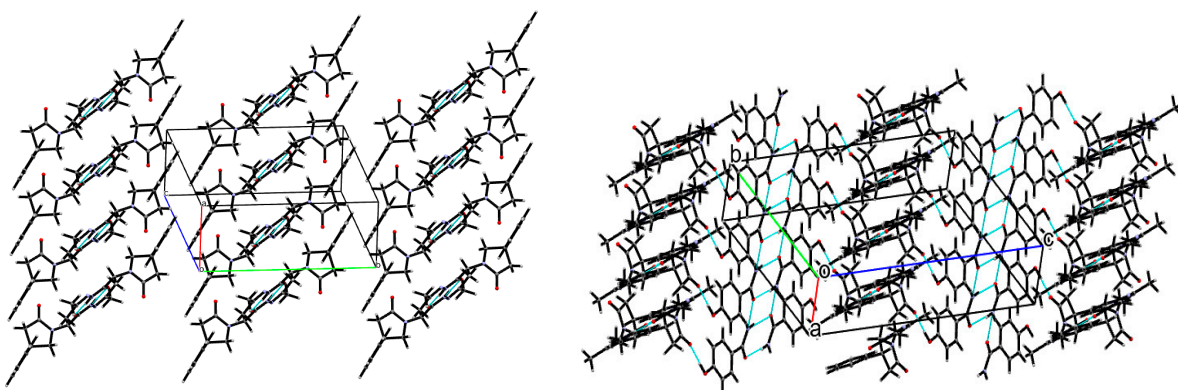

**Figure S3.** (a) Similar packing motifs in **PPAH** and **PPAH-HBD** cocrystal: (a) Stacking columns of the **PPAH** dimers along the shortest  $a$ -axis; (b) Stacking columns of the **PPAH** dimers along the shortest  $a$ -axis in cocrystal separated by double chains of coformer.

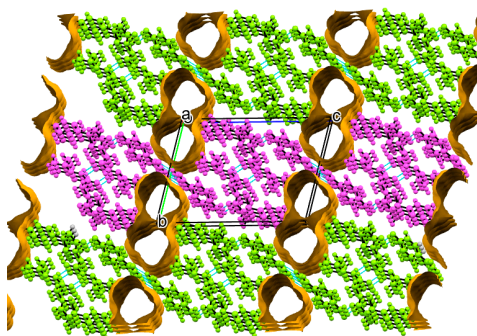

**Figure S4.** Packing of **PPAH-HBD** H-bonded layers with voids filled by the disordered acetone solvent molecules.

**Table S1.** Relative energies of **PPA** enantiomers with different conformations according to DFT calculations on B3LYP/6-311++(d,p) level of theory, kcal/mol

| Molecular structure                                                                 | Molecular and enantiomer ID | $\Delta E$ , kcal/mol |
|-------------------------------------------------------------------------------------|-----------------------------|-----------------------|
| 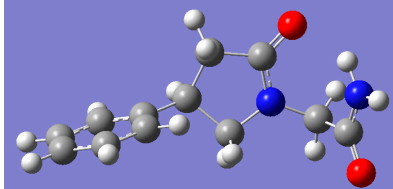   | PPA( <i>S</i> )-A           | 0.00                  |
|    | PPA( <i>R</i> )-A           | 1.24                  |
|   | PPA( <i>S</i> )-B           | 1.62                  |
|  | PPA( <i>R</i> )-B           | 1.78                  |
|  | PPA·2HBA( <i>R</i> )        | 3.14                  |
|  | PPA·2HBA( <i>S</i> )        | 1.78                  |
|  | PPA·HBA( <i>R;S</i> )       | 1.63                  |

The most favorable phenylpiracetam (**PPA**) structure is one of the conformers found in **PPA** crystal. Other three conformers in **PPA** crystal are less favorable from 1.24 to 1.78 kcal/mol according to calculations on B3LYP/6-311++G(d,p) level of theory. The differences between conformers **PPA(S)**-A and **PPA(R)**-A is in rotation of amid functional group around C-C bond (torsion angles O-C-C-N for **PPA(S)**-A is 115.0° and for **PPA(R)**-A is 153.8°). The same torsion angle for conformations **PPA(S)**-B and **PPA(R)**-B is more close to 0 (5.2° and 13.8° respectively). For conformers **PPA(S)**-A and **PPA(R)**-B torsion angles (N)C-C-C-C(Ph) of phenyl ring are very similar (60.5° and 59.0° respectively). Molecules **PPA(R)**-A and **PPA(S)**-B have different orientations of phenyl group characterized with torsion angles (117.2° and 118.0° respectively).

**Table S2.** Relative energies of **PPAH** enantiomers with different conformations according to DFT calculations on B3LYP/6-311++(d,p) level of theory, kcal/mol

| Molecular structure                                                                 | Molecular and enantiomer ID | $\Delta E$ , kcal/mol |
|-------------------------------------------------------------------------------------|-----------------------------|-----------------------|
| 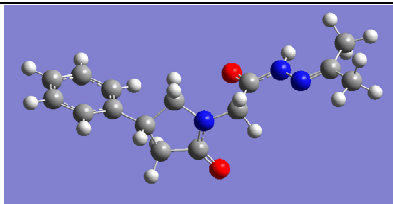  | <b>PPAH</b>                 | 0.00                  |
|  | <b>PPAH·HBD</b>             | 0.00                  |

Geometry parameters of molecule in pure material and cocrystal are very similar and there is no difference in their conformational energies.
